# Supplementary material for: Predicting inflammatory response of biomimetic nanofibre scaffolds for tissue regeneration using machine learning and graph theory
Source: Royal Society of Chemistry journal article supplement (doi:10.1039/d4tb02494j), 2025-01-01
Supplement: d4tb02494j1.pdf [file d4tb02494j1.pdf]

## SUPPLEMENTARY INFORMATION

### **Predicting Inflammatory Response of Biomimetic Nanofibre Scaffolds for Tissue**

#### **Regeneration Using Machine Learning and Graph Theory**

Lakshmi Yaneesha Sujeeun<sup>1,2</sup>, Itisha Chummun Phul<sup>1</sup>, Nowsheen Goonoo<sup>1</sup>, Nicholas A. Kotov<sup>2</sup>, Archana Bhaw-Luximon<sup>1\*</sup>

*<sup>1</sup>Biomaterials Drug Delivery and Nanotechnology Unit, Centre for Biomedical and Biomaterials Research (CBBR), University of Mauritius, Réduit, Mauritius*

*<sup>2</sup>Center for Complex Particle Systems (COMPASS), University of Michigan, Ann Arbor, Michigan 48109*

\*Corresponding author: [a.luximon@uom.ac.mu](mailto:a.luximon@uom.ac.mu)

**STable 1.** Physico-chemical characteristics (pore diameter, fibre diameter, water contact angle, and Young's modulus) of scaffolds, levels of TNF- $\alpha$  measured after 24 hours, ruffling index, and main phenotypes observed of macrophages.

| Nanoscaffolds                                            | Pore diameter /( $\mu\text{m}$ ) | Fibre diameter/ ( $\mu\text{m}$ ) | Water contact angle/ ( $^{\circ}$ ) | Young's modulus/ (MPa) | Concentration of TNF- $\alpha$ /(pg/ml) | Ruffling index | Phenotype |
|----------------------------------------------------------|----------------------------------|-----------------------------------|-------------------------------------|------------------------|-----------------------------------------|----------------|-----------|
| <b>Polyhydroxybutyrate (PHB)/kappa-carrageenan (KCG)</b> |                                  |                                   |                                     |                        |                                         |                |           |
| <b>100/0</b>                                             | 1.9 $\pm$ 0.7                    | 1.3 $\pm$ 0.4                     | 126 $\pm$ 1                         | 518.2 $\pm$ 36.5       | 803.9 $\pm$ 56.4                        | 2.8 $\pm$ 0.1  | M1        |
| <b>90/10</b>                                             | 1.2 $\pm$ 0.6                    | 0.9 $\pm$ 0.5                     | 120 $\pm$ 1.9                       | 271.7 $\pm$ 58.9       | 1123.7 $\pm$ 36.9                       | 1.9 $\pm$ 0.3  | M1        |
| <b>80/20</b>                                             | 0.9 $\pm$ 0.3                    | 0.7 $\pm$ 0.5                     | 107 $\pm$ 1.3                       | 160.5 $\pm$ 32.8       | 947.0 $\pm$ 141.7                       | 2.1 $\pm$ 0.2  | M1        |
| <b>70/30</b>                                             | 1.1 $\pm$ 0.5                    | 0.7 $\pm$ 0.5                     | 104 $\pm$ 0.9                       | 90.6 $\pm$ 10.9        | 631.2 $\pm$ 151.2                       | 2.6 $\pm$ 0.2  | M1        |
| <b>Poly(hydroxybutyrate-co-valerate (PHBV)/KCG</b>       |                                  |                                   |                                     |                        |                                         |                |           |
| <b>100/0</b>                                             | 0.8 $\pm$ 0.3                    | 0.4 $\pm$ 0.1                     | 112 $\pm$ 1                         | 197.2 $\pm$ 44.6       | 784.6 $\pm$ 58.8                        | 2.6 $\pm$ 0.1  | M1        |
| <b>90/10</b>                                             | 1.0 $\pm$ 0.5                    | 0.7 $\pm$ 0.2                     | 73.6 $\pm$ 2.8                      | 160 $\pm$ 14.8         | 1345.5 $\pm$ 63.6                       | 0.2 $\pm$ 0.1  | M1        |
| <b>80/20</b>                                             | 0.9 $\pm$ 0.3                    | 0.6 $\pm$ 0.2                     | 62.4 $\pm$ 0.5                      | 111.7 $\pm$ 22.2       | 1293.0 $\pm$ 67.8                       | 0.2 $\pm$ 0.1  | M1        |
| <b>70/30</b>                                             | 1.0 $\pm$ 0.5                    | 0.5 $\pm$ 0.2                     | 57.8 $\pm$ 1.7                      | 108.5 $\pm$ 6.8        | 865.6 $\pm$ 35.3                        | 0.2 $\pm$ 0.1  | M0        |
| <b>Polydioxanone (PDX)/fucoidan (FUC)</b>                |                                  |                                   |                                     |                        |                                         |                |           |
| <b>100/0</b>                                             | 0.2 $\pm$ 0.06                   | 0.3 $\pm$ 0.1                     | 32.1 $\pm$ 0.0                      | 73.8 $\pm$ 7.6         | 261.1 $\pm$ 57.9                        | 2.9 $\pm$ 0.1  | M1        |
| <b>90/10</b>                                             | 0.2 $\pm$ 0.08                   | 0.2 $\pm$ 0.07                    | 32.1 $\pm$ 0.0                      | 69.6 $\pm$ 8.4         | 854.5 $\pm$ 47.9                        | 1.7 $\pm$ 0.1  | M1        |
| <b>80/20</b>                                             | 0.2 $\pm$ 0.1                    | 0.2 $\pm$ 0.05                    | 32.1 $\pm$ 0.0                      | 38.1 $\pm$ 3.9         | 644.8 $\pm$ 67.5                        | 0.9 $\pm$ 0.1  | M1        |
| <b>70/30</b>                                             | 0.2 $\pm$ 0.1                    | 0.2 $\pm$ 0.05                    | 32.1 $\pm$ 0.0                      | 35 $\pm$ 11.3          | 1079.6 $\pm$ 2.1                        | 1.2 $\pm$ 0.2  | M1        |
| <b>PDX/KCG</b>                                           |                                  |                                   |                                     |                        |                                         |                |           |
| <b>100/0</b>                                             | 2.0 $\pm$ 0.7                    | 1.1 $\pm$ 0.3                     | 32.1 $\pm$ 0.0                      | 73.8 $\pm$ 7.6         | 537.0 $\pm$ 125.2                       | 2.5 $\pm$ 0.1  | M1        |
| <b>90/10</b>                                             | 1.6 $\pm$ 0.5                    | 1.0 $\pm$ 0.2                     | 32.1 $\pm$ 0.0                      | 72 $\pm$ 6.5           | 376.7 $\pm$ 76.6                        | 3.0 $\pm$ 0.0  | M1        |
| <b>80/20</b>                                             | 1.5 $\pm$ 0.6                    | 0.9 $\pm$ 0.2                     | 32.1 $\pm$ 0.0                      | 42.6 $\pm$ 6.3         | 258.9 $\pm$ 49.9                        | 1.2 $\pm$ 0.5  | M0        |
| <b>70/30</b>                                             | 0.9 $\pm$ 0.3                    | 0.5 $\pm$ 0.2                     | 32.1 $\pm$ 0.0                      | 38.2 $\pm$ 5.5         | 504.5 $\pm$ 62.1                        | 0.3 $\pm$ 0.2  | M0        |

| <b>PDX/PHBV</b>                    |            |            |             |              |               |           |    |
|------------------------------------|------------|------------|-------------|--------------|---------------|-----------|----|
| <b>100/0</b>                       | 1.1 ± 0.4  | 0.4 ± 0.1  | 32.1 ± 0.0  | 73.8 ± 7.6   | 196.5 ± 16.7  | 1.6 ± 0.3 | M1 |
| <b>90/10</b>                       | 1.7 ± 0.6  | 1.0 ± 0.3  | 32.1 ± 0.0  | 95.6 ± 11.6  | 722.3 ± 37.3  | 1.6 ± 0.7 | M1 |
| <b>80/20</b>                       | 1.2 ± 0.4  | 0.7 ± 0.3  | 105.1 ± 2.2 | 72.9 ± 6.9   | 1210.5 ± 61.8 | 0.2 ± 0.1 | M1 |
| <b>70/30</b>                       | 1.2 ± 0.5  | 0.6 ± 0.2  | 119.6 ± 2.5 | 100.4 ± 18.3 | 675.2 ± 63.8  | 2.4 ± 0.2 | M0 |
| <b>PDX/polysucrose (PSuc)</b>      |            |            |             |              |               |           |    |
| <b>100/0</b>                       | 8.9 ± 5.4  | 1.0 ± 0.04 | 32.1 ± 0.0  | 51.8 ± 10.3  | 219.4 ± 49.7  | 2.9 ± 0.1 | M0 |
| <b>90/10</b>                       | 6.2 ± 4.2  | 0.8 ± 0.1  | 32.1 ± 0.0  | 43.0 ± 10.4  | 296.1 ± 90.0  | 3.0 ± 0.1 | M1 |
| <b>80/20</b>                       | 5.1 ± 2.8  | 0.8 ± 0.03 | 32.1 ± 0.0  | 31.5 ± 5.2   | 230.1 ± 88.1  | 2.8 ± 0.1 | M1 |
| <b>70/30</b>                       | 4.1 ± 3.2  | 0.7 ± 0.06 | 32.1 ± 0.0  | 83.2 ± 23.9  | 202.6 ± 41.6  | 2.9 ± 0.0 | M1 |
| <b>60/40</b>                       | 3.6 ± 2.3  | 0.7 ± 0.03 | 32.1 ± 0.0  | 58.2 ± 27.5  | 151.2 ± 11.8  | 3.0 ± 0.0 | M1 |
| <b>50/50</b>                       | 3.4 ± 2.5  | 0.6 ± 0.04 | 32.1 ± 0.0  | 33.0 ± 2.0   | 226.9 ± 57.9  | 2.9 ± 0.0 | M1 |
| <b>Poly-L-lactide(PLLA)/ PSuc</b>  |            |            |             |              |               |           |    |
| <b>100/0</b>                       | 5.7 ± 3.3  | 1.0 ± 0.05 | 141.3 ± 2.0 | 235 ± 15     | 163.7 ± 29.9  | 2.0 ± 0.0 | M2 |
| <b>90/10</b>                       | 4.2 ± 2.5  | 0.9 ± 0.1  | 135.1 ± 1.6 | 109 ± 8.7    | 149.0 ± 24.8  | 2.8 ± 0.0 | M2 |
| <b>80/20</b>                       | 3.9 ± 2.4  | 0.8 ± 0.03 | 134.0 ± 0.7 | 114.3 ± 4.0  | 168.7 ± 36.3  | 2.4 ± 0.1 | M1 |
| <b>70/30</b>                       | 2.9 ± 2.0  | 0.7 ± 0.04 | 126.3 ± 4.7 | 85.7 ± 5.9   | 173.1 ± 15.9  | 2.4 ± 0.3 | M1 |
| <b>60/40</b>                       | 2.01 ± 0.8 | 0.7 ± 0.01 | 132.9 ± 1.1 | 90.7 ± 5.5   | 245.6 ± 55.6  | 2.4 ± 0.7 | M1 |
| <b>50/50</b>                       | 2.4 ± 1.5  | 0.6 ± 0.02 | 81.6 ± 9.5  | 99.3 ± 31.6  | 240.3 ± 61.0  | 1.3 ± 0.1 | M1 |
| <b>PLLA/cellulose acetate (CA)</b> |            |            |             |              |               |           |    |
| <b>0/100</b>                       | 0.83 ± 0.3 | 0.7 ± 0.08 | 134.4 ± 1.8 | 90.4 ± 15.3  | 180.9 ± 26.9  | 0.4 ± 0.0 | M1 |
| <b>100/0</b>                       | 5.7 ± 3.3  | 1.0 ± 0.3  | 140.7 ± 1.8 | 235.4 ± 14.8 | 163.7 ± 29.9  | 2.0 ± 0.0 | M1 |
| <b>30/70</b>                       | 3.5 ± 1.1  | 0.6 ± 0.2  | 119.5 ± 0.9 | 58.9 ± 3.3   | 140.7 ± 12.8  | 1.0 ± 0.0 | M1 |
| <b>50/50</b>                       | 2.0 ± 0.6  | 0.5 ± 0.2  | 117.3 ± 1.3 | 104.4 ± 13.8 | 170.7 ± 3.3   | 1.8 ± 0.0 | M1 |

|                                       |           |            |             |              |               |           |    |
|---------------------------------------|-----------|------------|-------------|--------------|---------------|-----------|----|
| <b>PLLA/cellulose</b>                 |           |            |             |              |               |           |    |
| <b>0/100</b>                          | 1.5 ± 0.6 | 0.3 ± 0.1  | 25.0 ± 0.0  | 162.3 ± 21.3 | 280.3 ± 7.0   | 2.8 ± 0.0 | M1 |
| <b>30/70</b>                          | 3.5 ± 1.0 | 0.6 ± 0.2  | 25.0 ± 0.0  | 95.7 ± 6.7   | 330.7 ± 27.2  | 2.9 ± 0.0 | M1 |
| <b>50/50</b>                          | 2.3 ± 0.5 | 0.3 ± 0.07 | 25.0 ± 0.0  | 102.6 ± 72.8 | 338.0 ± 102.0 | 2.9 ± 0.0 | M1 |
| <b>PDX/CA</b>                         |           |            |             |              |               |           |    |
| <b>100/0</b>                          | 8.9 ± 5.4 | 1.2 ± 0.5  | 32.1 ± 0.0  | 51.8 ± 10.3  | 239.4 ± 61.9  | 2.6 ± 0.0 | M1 |
| <b>30/70</b>                          | 4.8 ± 2.1 | 0.8 ± 0.3  | 32.1 ± 0.0  | 134.5 ± 15.5 | 300.0 ± 28.1  | 2.3 ± 0.0 | M1 |
| <b>50/50</b>                          | 2.2 ± 0.5 | 0.6 ± 0.2  | 32.1 ± 0.0  | 65.7 ± 14.0  | 298.9 ± 15.8  | 2.8 ± 0.0 | M1 |
| <b>Poly(D,L-lactic acid) PDLLA/CA</b> |           |            |             |              |               |           |    |
| <b>70/30</b>                          | 2.9 ± 0.9 | 0.4 ± 0.1  | 130.4 ± 1.3 | 66.9 ± 8.9   | 197.4 ± 9.9   | 1.0 ± 0.0 | M1 |
| <b>50/50</b>                          | 2.4 ± 0.5 | 0.4 ± 0.1  | 123.6 ± 0.4 | 89.2 ± 10.3  | 270.7 ± 30.2  | 1.0 ± 0.0 | M0 |
| <b>PDLLA/cellulose</b>                |           |            |             |              |               |           |    |
| <b>0/100</b>                          | 5.7 ± 3.3 | 1.0 ± 0.1  | 128.6 ± 0.8 | 168.3 ± 16.4 | 280.3 ± 7.0   | 2.8 ± 0.0 | M1 |
| <b>30/70</b>                          | 2.2 ± 0.4 | 0.4 ± 0.1  | 25.0 ± 0.0  | 48.4 ± 20.8  | 350.9 ± 104.7 | 3.0 ± 0.0 | M1 |
| <b>50/50</b>                          | 1.9 ± 0.5 | 0.3 ± 0.1  | 25.0 ± 0.0  | 135.1 ± 41.7 | 346.8 ± 61.9  | 2.9 ± 0.0 | M1 |

**STable 2.** Hyperparameters used for each regression model.

| <b>Regression model</b>               | <b>Best values</b>                                                                |
|---------------------------------------|-----------------------------------------------------------------------------------|
| <b>Support Vector regression</b>      | Kernel: rbf, C: 100, Epsilon: 0.1, Gamma: scale                                   |
| <b>Random Forest regression</b>       | n_estimators: 200, max_depth: 15,<br>min_samples_split: 2                         |
| <b>Lasso regression</b>               | Alpha: 0.01                                                                       |
| <b>Ridge regression</b>               | Alpha: 0.01                                                                       |
| <b>Decision Tree regression</b>       | max_depth: 10, min_samples_split: 4, Criterion: mse                               |
| <b>k-Nearest Neighbors regression</b> | n_neighbors: 5, Weights: distance, Distance metric<br>(p): 2 (Euclidean distance) |

**STable 3.** Quantitative comparison of macrophage morphology and texture features between M0 and M1 phenotypes identified from a batch of SEM images. The table presents key morphological and texture parameters, including cell area, eccentricity, circularity, mean intensity, and texture features (Zernike, Haralick, and Gabor), for both phenotypes. Data are expressed as mean  $\pm$  standard deviation. Statistical differences (P-values) between M0 and M1 macrophages are indicated for each feature.

| <b>Feature</b>                                        | <b>M0 Macrophages</b> | <b>M1 Macrophages</b> | <b>P-value</b> |
|-------------------------------------------------------|-----------------------|-----------------------|----------------|
| <b>Number of cells</b>                                | 6                     | 8                     | -              |
| <b>Average cell area (<math>\mu\text{m}^2</math>)</b> | 295 $\pm$ 45          | 455 $\pm$ 75          | 0.025          |
| <b>Shape (eccentricity)</b>                           | 0.30 $\pm$ 0.05       | 0.70 $\pm$ 0.07       | < 0.001        |
| <b>Mean intensity</b>                                 | 110 $\pm$ 20          | 200 $\pm$ 35          | 0.032          |
| <b>Circularity</b>                                    | 0.94 $\pm$ 0.08       | 0.50 $\pm$ 0.12       | < 0.001        |
| <b>Zernike shape features</b>                         | 0.43 $\pm$ 0.14       | 0.35 $\pm$ 0.10       | 0.086          |
| <b>Haralick texture features</b>                      | 2.20 $\pm$ 0.45       | 3.10 $\pm$ 0.70       | 0.018          |
| <b>Gabor texture features</b>                         | 1.75 $\pm$ 0.55       | 2.60 $\pm$ 0.85       | 0.015          |

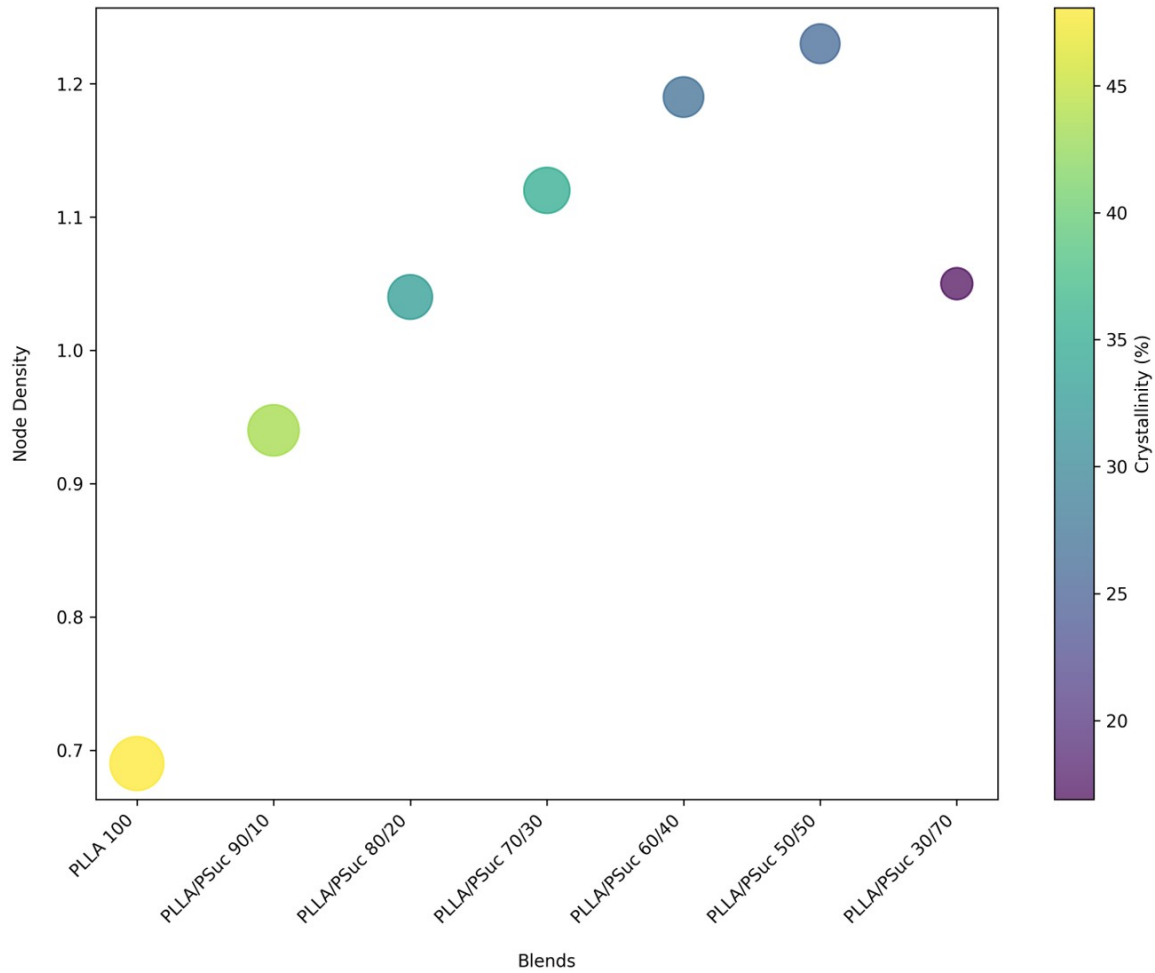

**Sfig. 1.** Bubble chart showing the relationship between node density and crystallinity for different PLLA/PSuc blends. The colour of the bubbles indicates the percentage of crystallinity, with darker colours representing lower crystallinity values. Larger bubbles indicate lower node density, highlighting the inverse relationship between node density and crystallinity for different PLLA/PSuc blends.
